# Supplementary material for: Recurrent processes support a cascade of hierarchical decisions
Source: eLife journal article supplement (doi:10.7554/elife.56603), 2020-09-01
Supplement: supp [file elife-56603-supp-v1.zip]

Archive with 19 entries (19 files):
- elife_poa_e56603_Transparent_Reporting_File.docx
- elife_poa_e56603_Figure_2_animation_1.gif
- elife_poa_e56603_Video_1.mov
- elife_poa_e56603_Video_2.mov
- elife_poa_e56603_Figure_2_figure_supplement_1.pdf
- elife_poa_e56603_Figure_2_figure_supplement_2.pdf
- elife_poa_e56603_Figure_2_figure_supplement_3.pdf
- elife_poa_e56603_Figure_2_figure_supplement_4.png
- elife_poa_e56603_Figure_2_figure_supplement_5.png
- elife_poa_e56603_Figure_2_figure_supplement_6.png
- elife_poa_e56603_Figure_2_figure_supplement_7.png
- elife_poa_e56603_Figure_2_figure_supplement_8.png
- elife_poa_e56603_Figure_2_figure_supplement_9.png
- elife_poa_e56603_Figure_2_figure_supplement_10.pdf
- elife_poa_e56603_Figure_2_figure_supplement_11.png
- elife_poa_e56603_Figure_5_figure_supplement_1.png
- elife_poa_e56603_Figure_6_figure_supplement_1.png
- elife_poa_e56603_Figure_6_figure_supplement_2.png
- elife_poa_e56603_Supplementary_file_1.docx
