# Supplementary material for: Recurrent processes support a cascade of hierarchical decisions
Source: eLife journal article supplement (doi:10.7554/elife.56603), 2020-09-01

# Univariate maps of uncorrected log-transformed p-values

Motor side

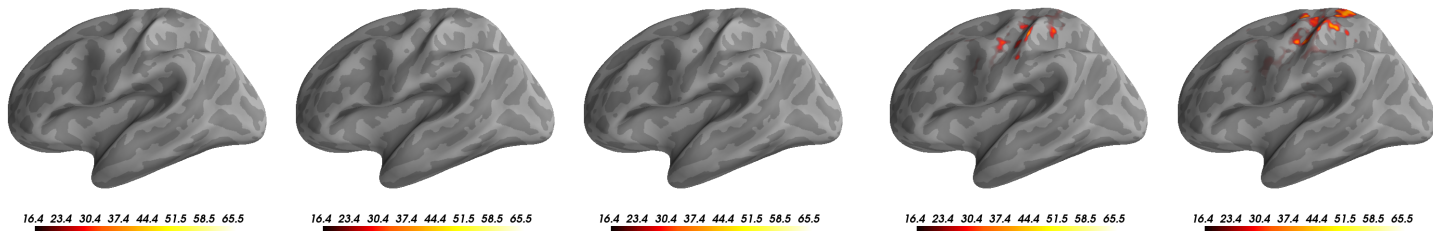

Ambiguity

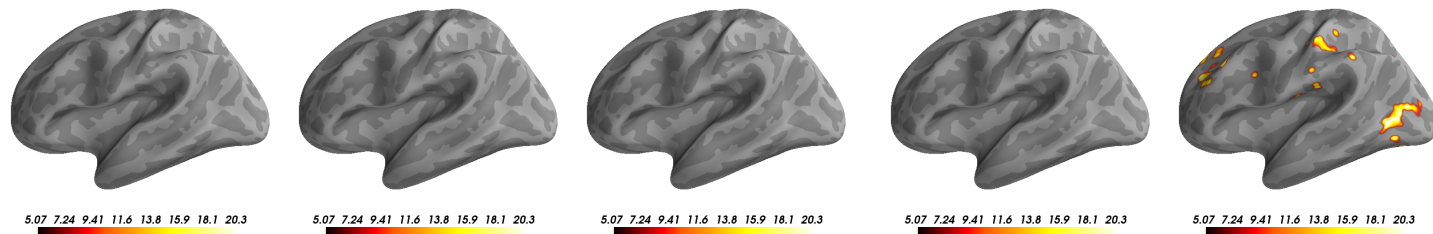

Decision

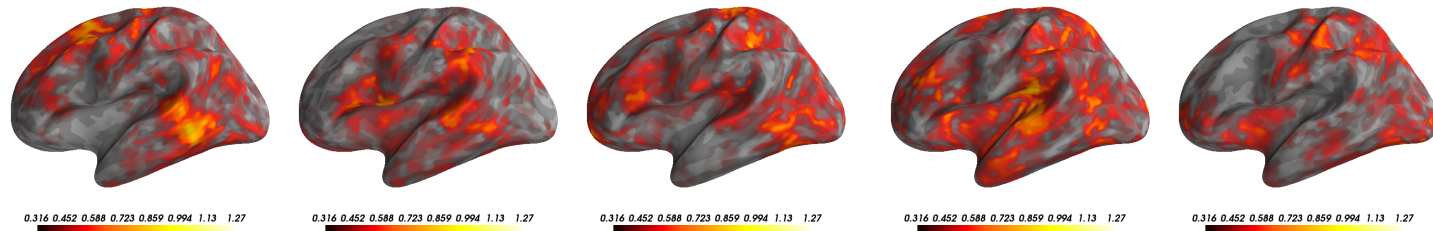

Stim Identity

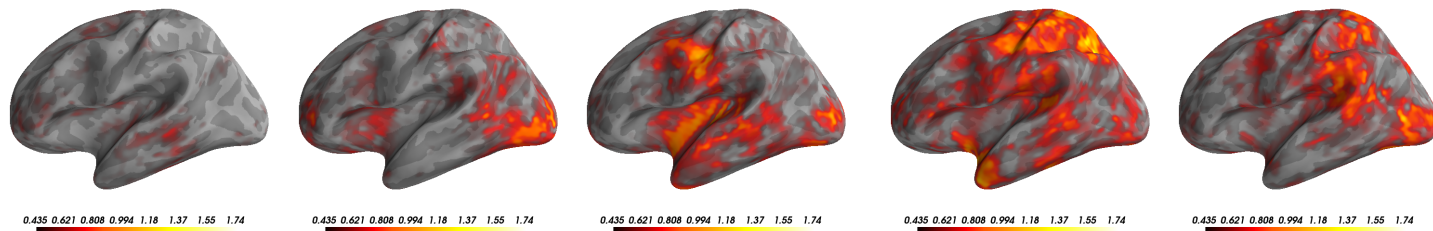

Stim Side

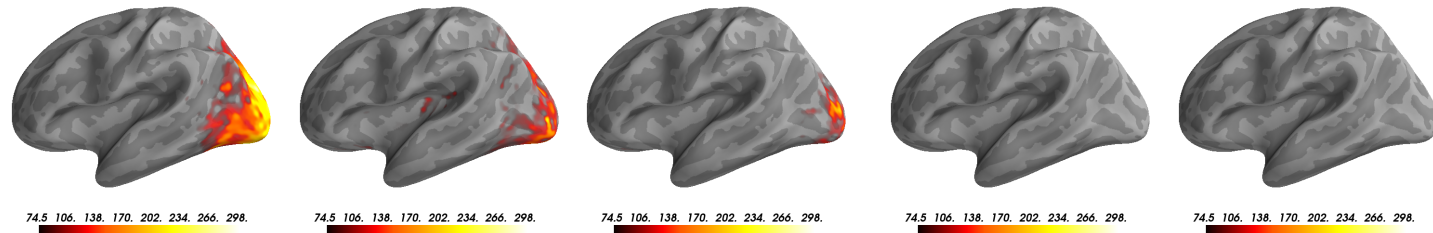

Supplement: supp [file elife-56603-supp-v1.zip › elife_poa_e56603_Figure_2_figure_supplement_10.pdf]
