# Supplementary figures and images for: Recurrent processes support a cascade of hierarchical decisions
Source: eLife journal article supplement (doi:10.7554/elife.56603), 2020-09-01

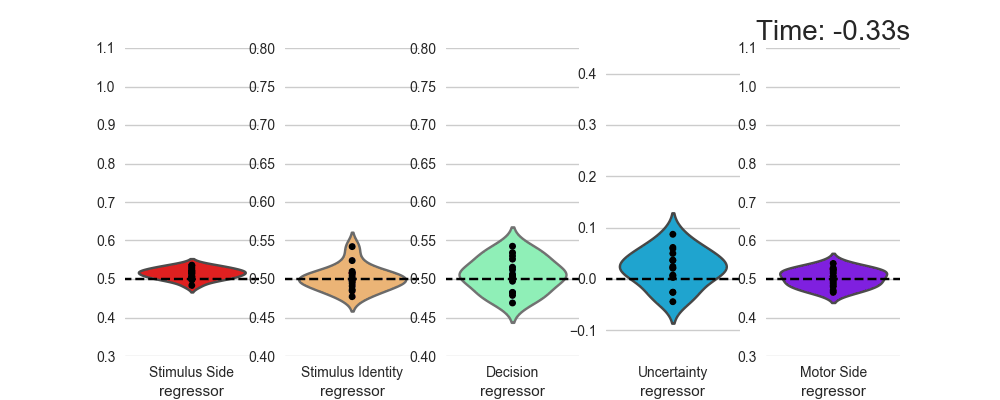

Supplement: supp [file elife-56603-supp-v1.zip › elife_poa_e56603_Figure_2_animation_1.gif]

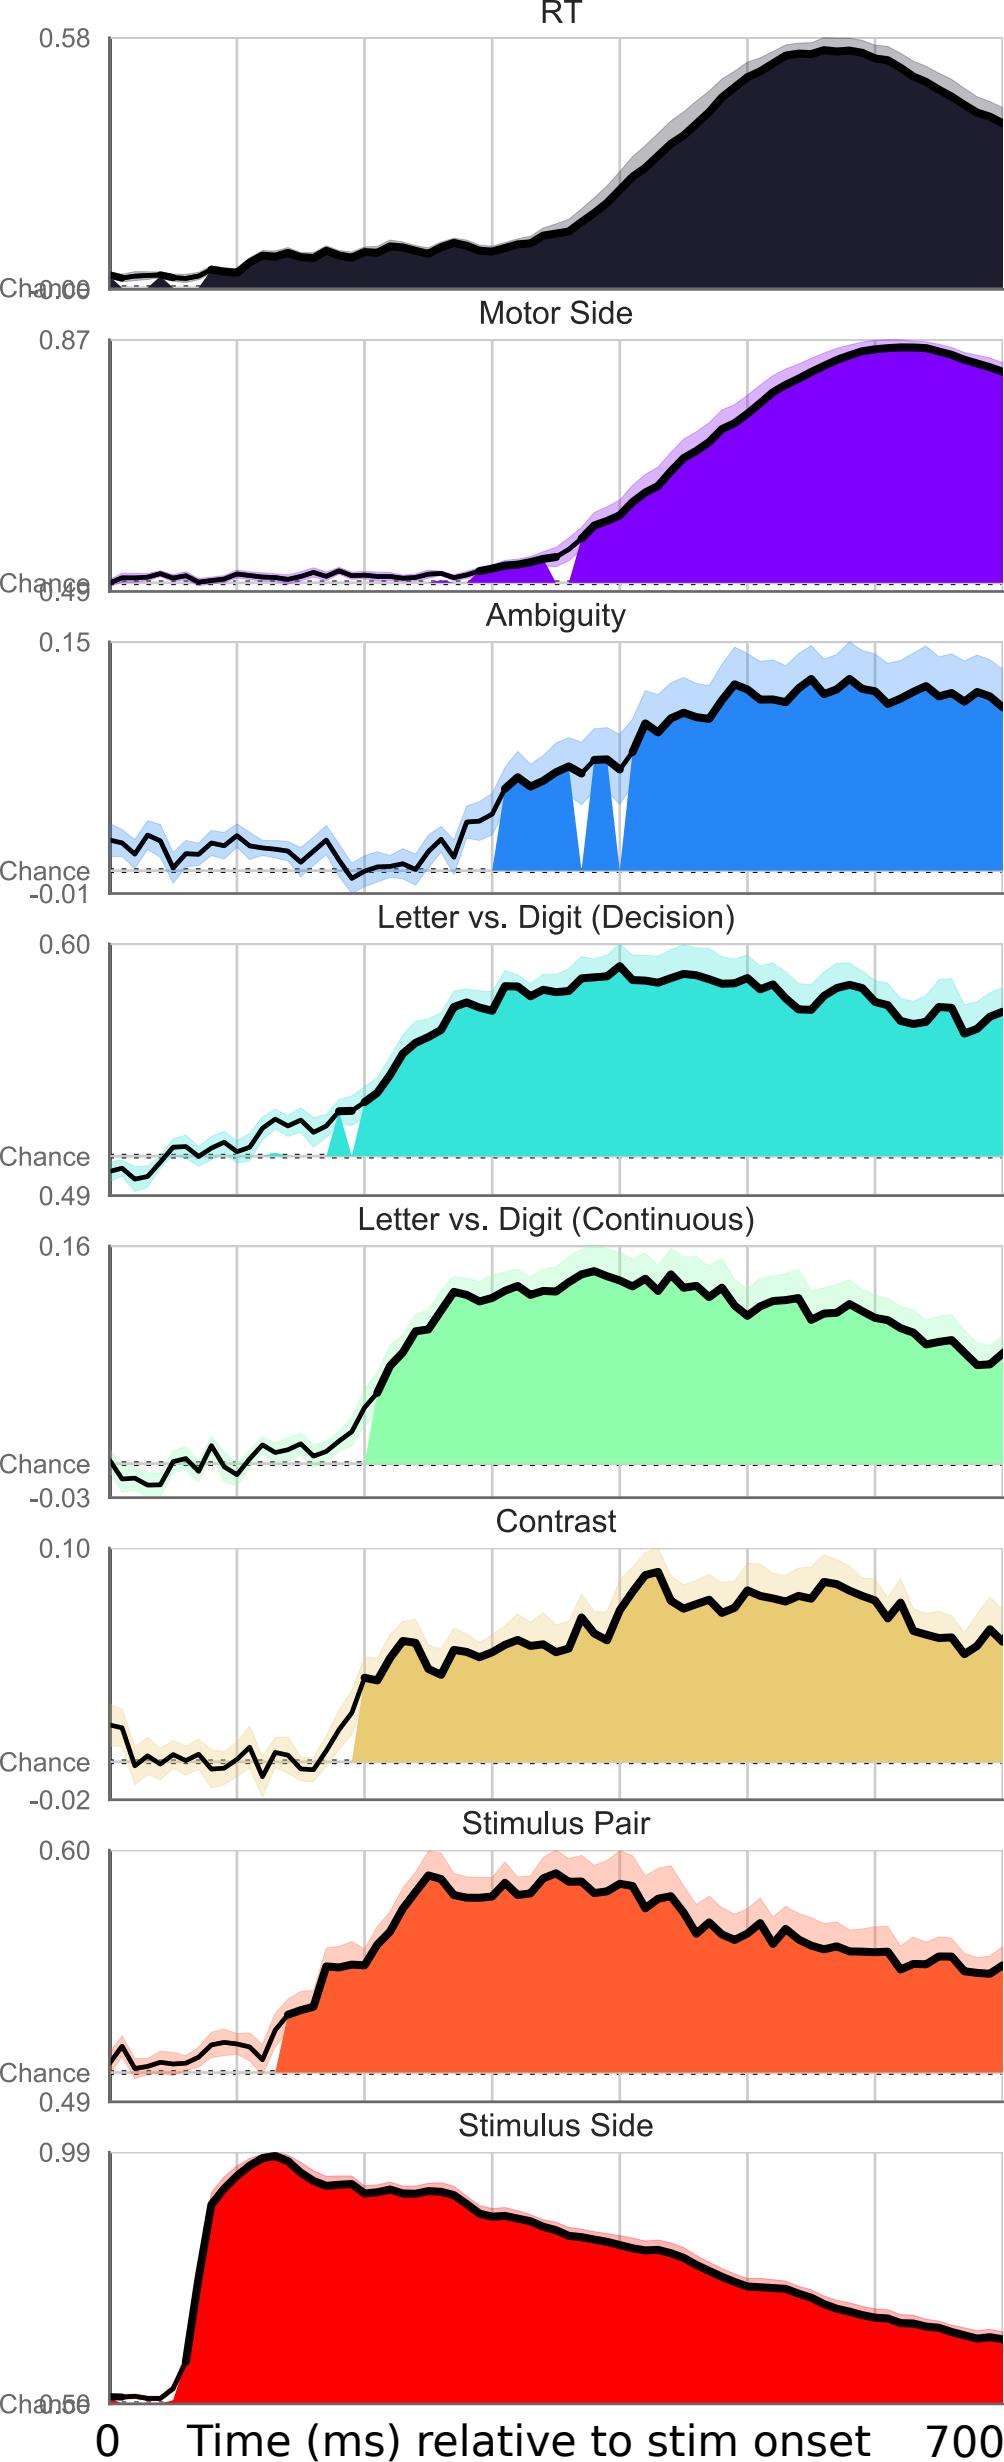

Supplement: supp [file elife-56603-supp-v1.zip › elife_poa_e56603_Figure_2_figure_supplement_1.pdf]

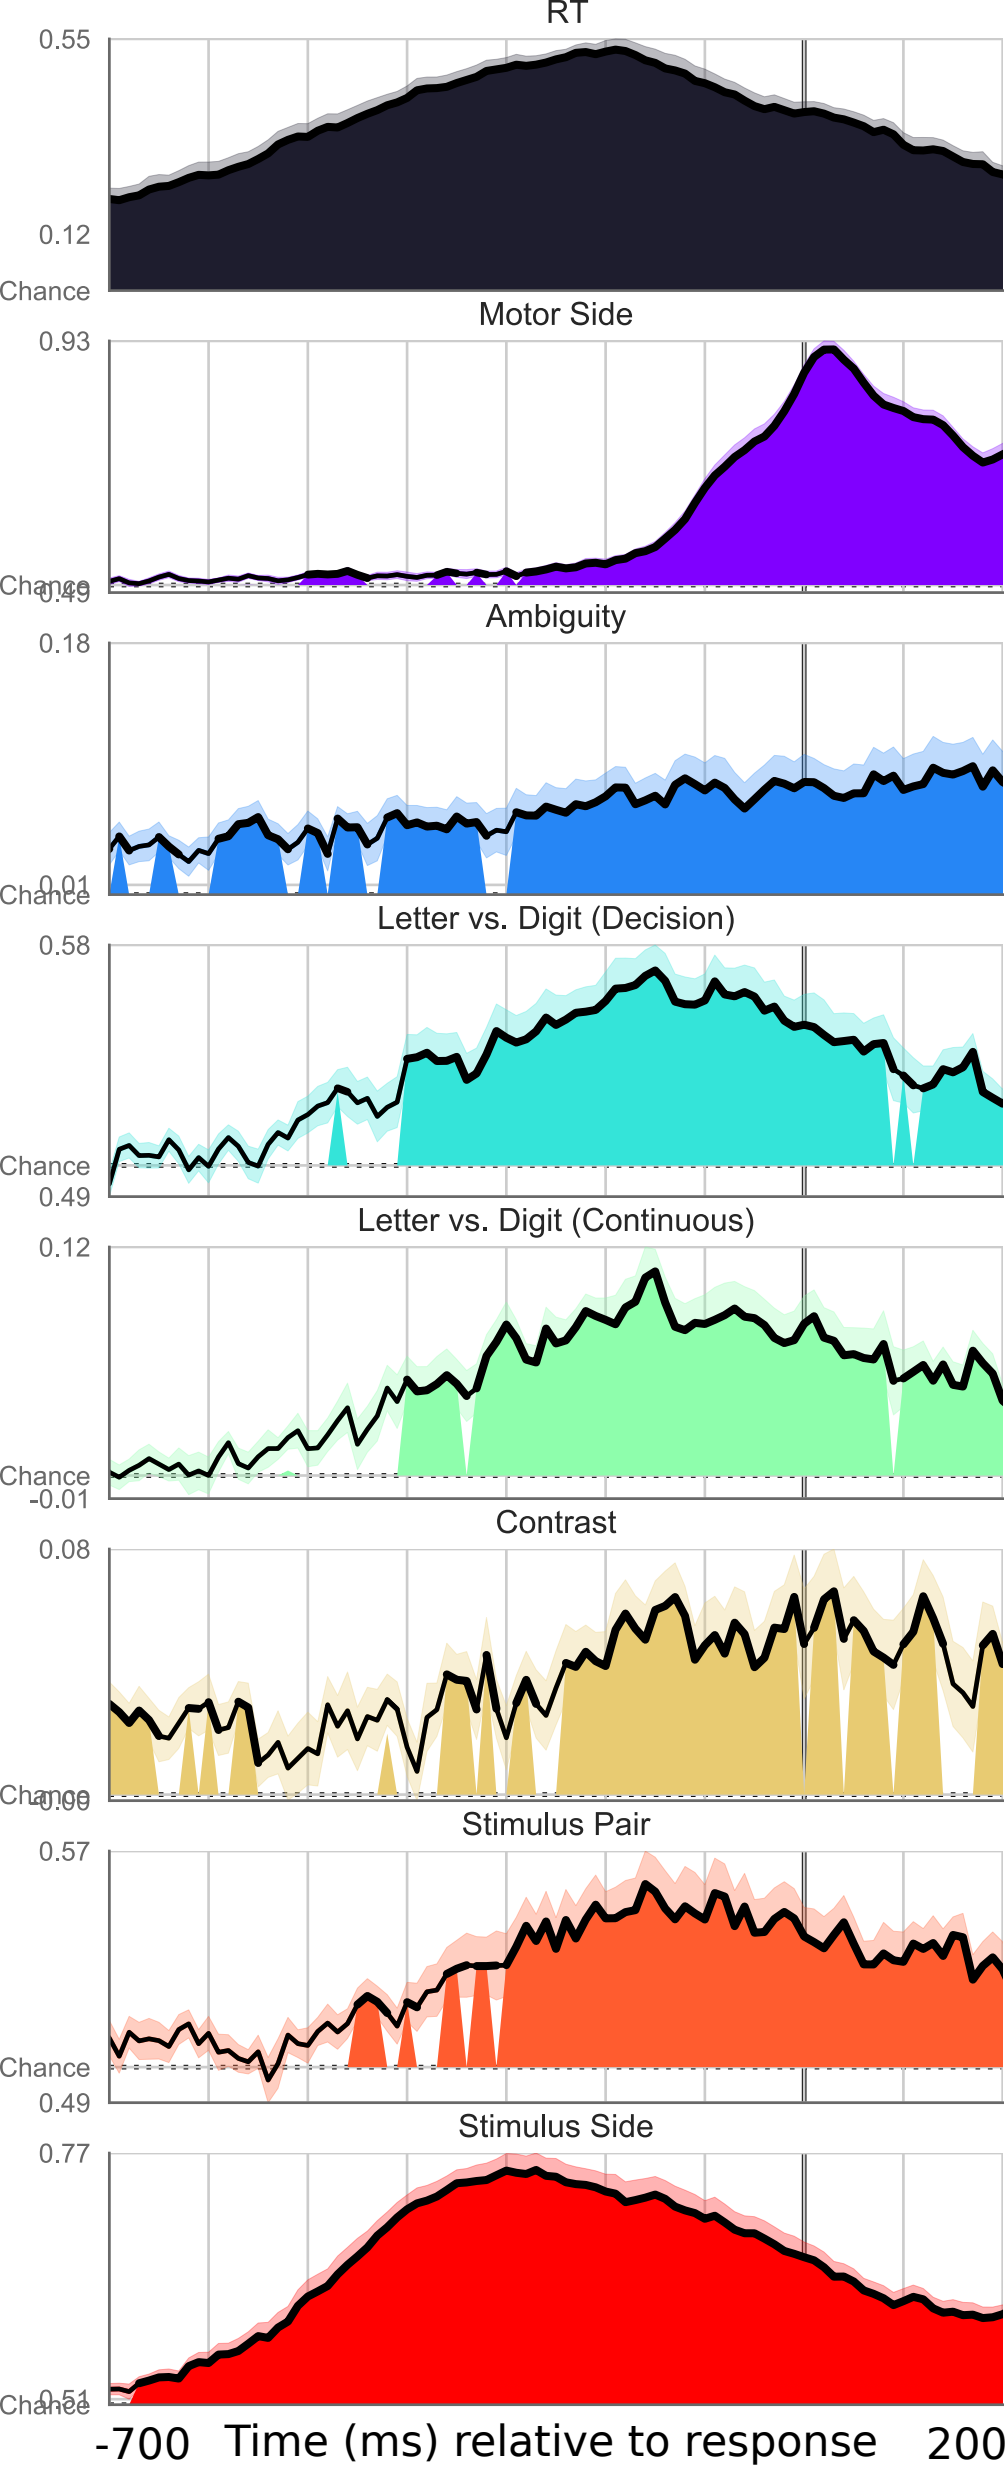

Supplement: supp [file elife-56603-supp-v1.zip › elife_poa_e56603_Figure_2_figure_supplement_2.pdf]

# Results of passive trials

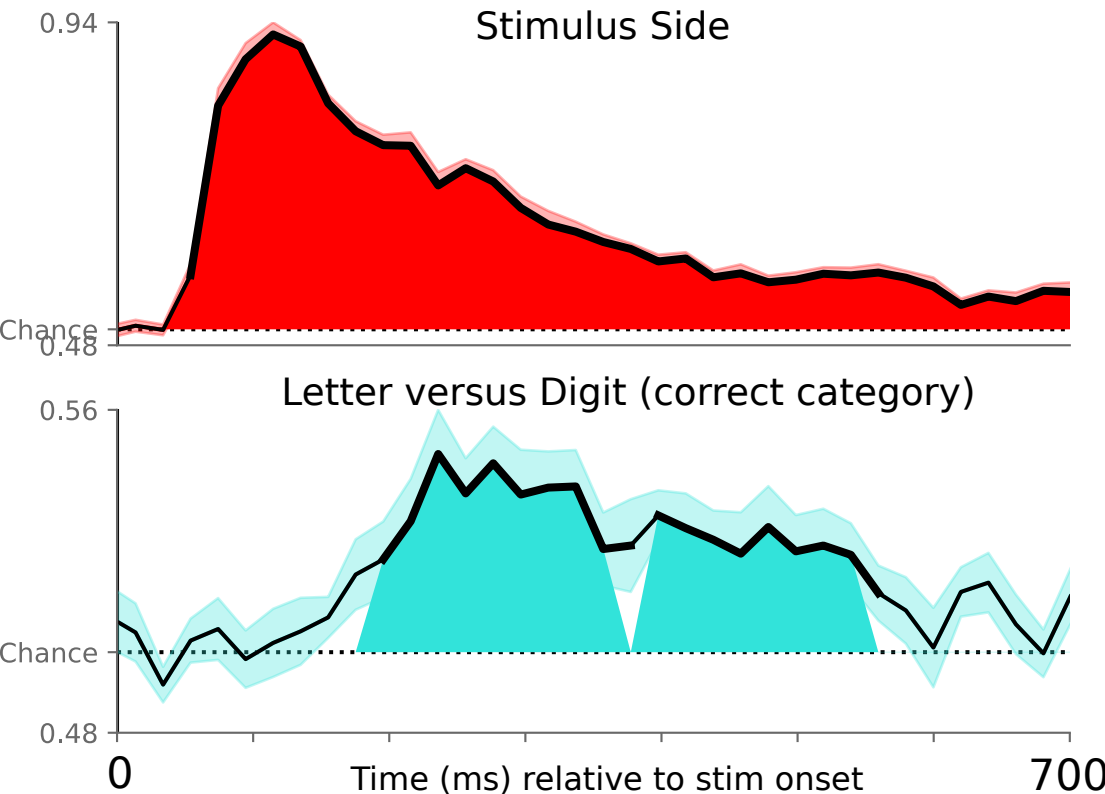

Supplement: supp [file elife-56603-supp-v1.zip › elife_poa_e56603_Figure_2_figure_supplement_3.pdf]

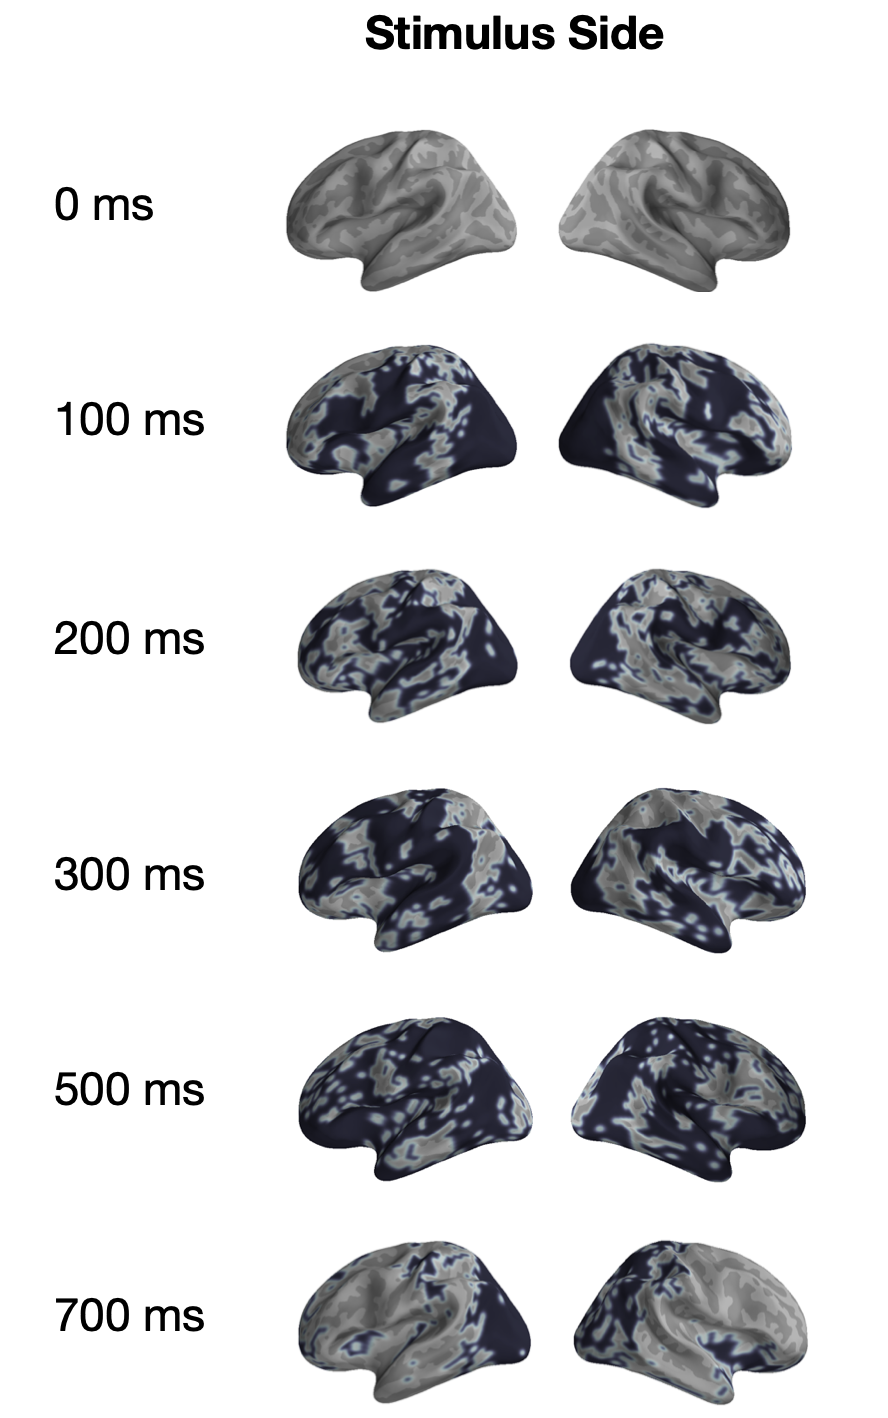

Supplement: supp [file elife-56603-supp-v1.zip › elife_poa_e56603_Figure_2_figure_supplement_4.png]

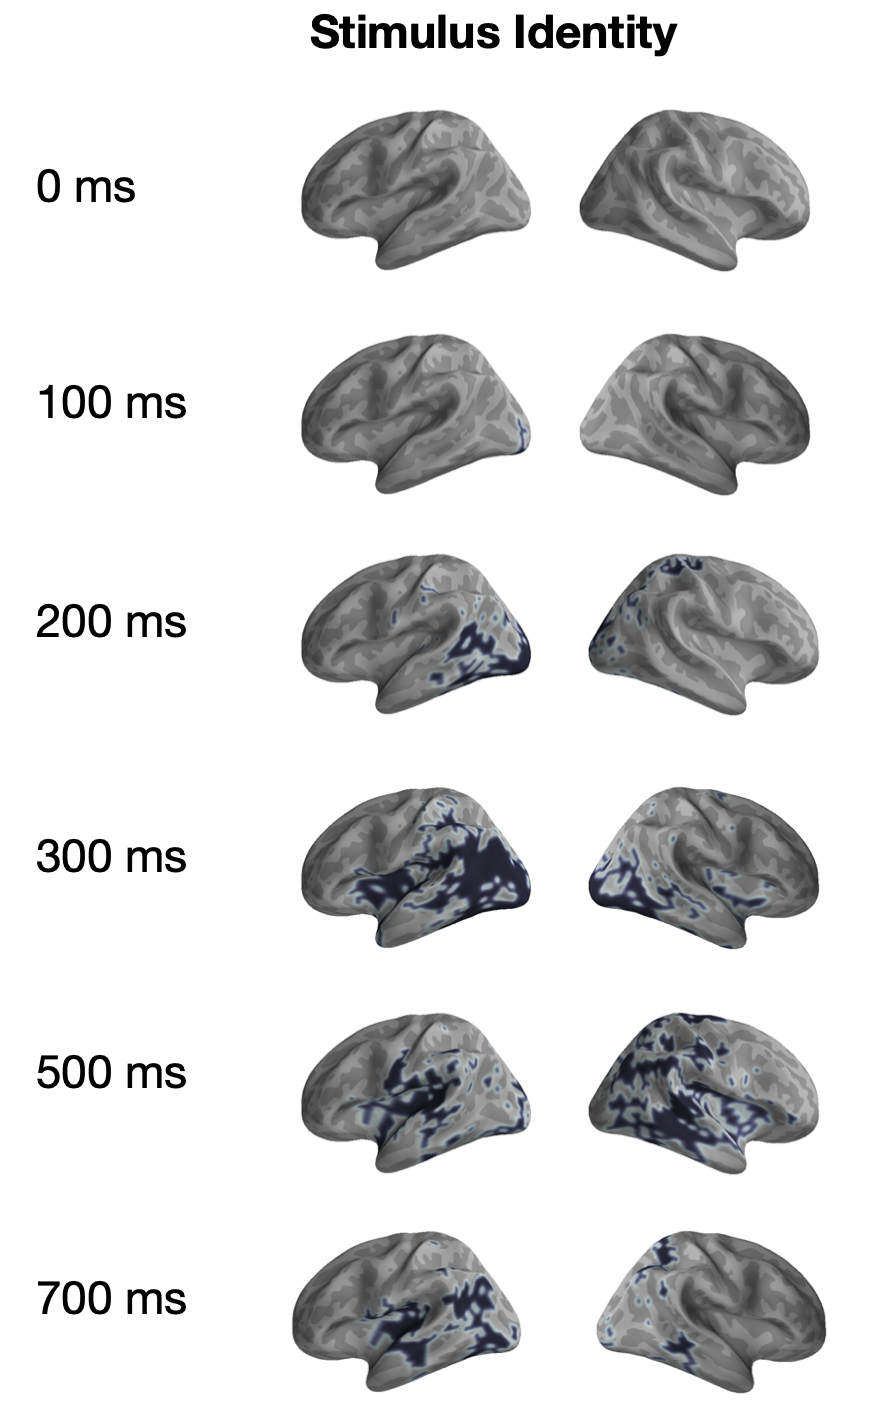

Supplement: supp [file elife-56603-supp-v1.zip › elife_poa_e56603_Figure_2_figure_supplement_5.png]

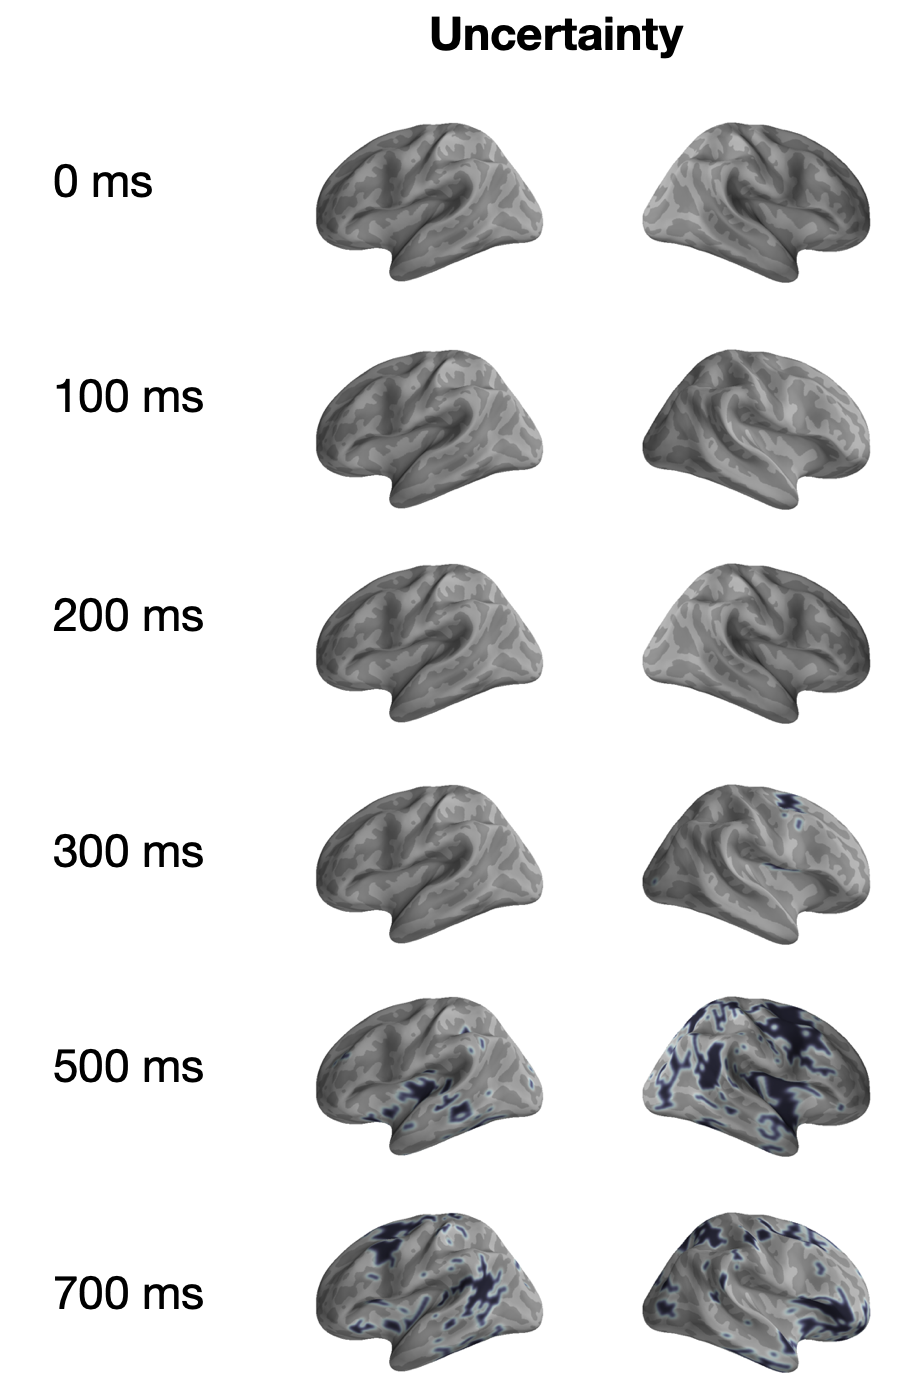

Supplement: supp [file elife-56603-supp-v1.zip › elife_poa_e56603_Figure_2_figure_supplement_6.png]

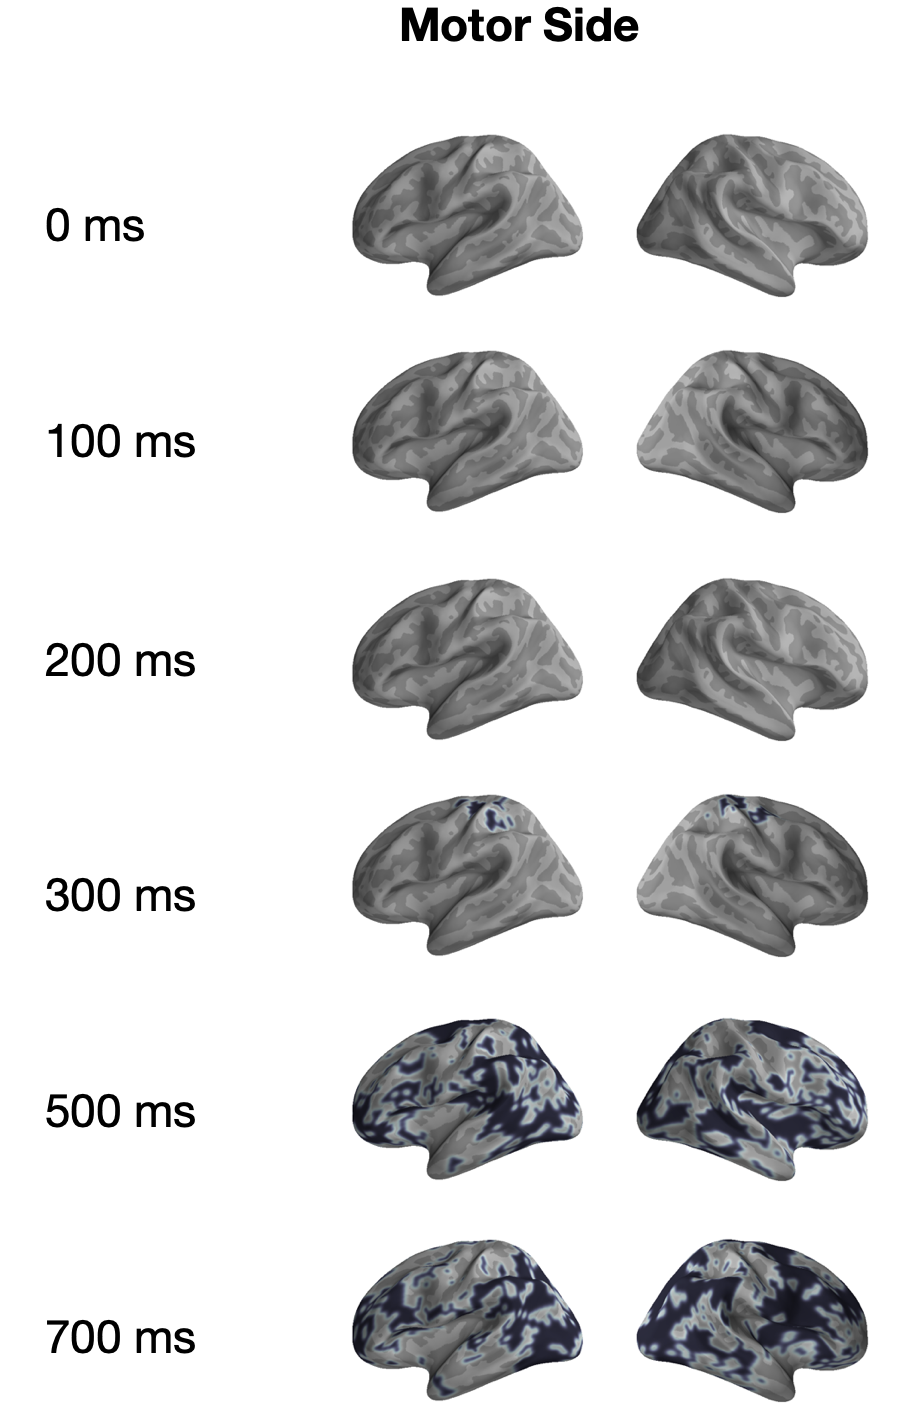

Supplement: supp [file elife-56603-supp-v1.zip › elife_poa_e56603_Figure_2_figure_supplement_7.png]

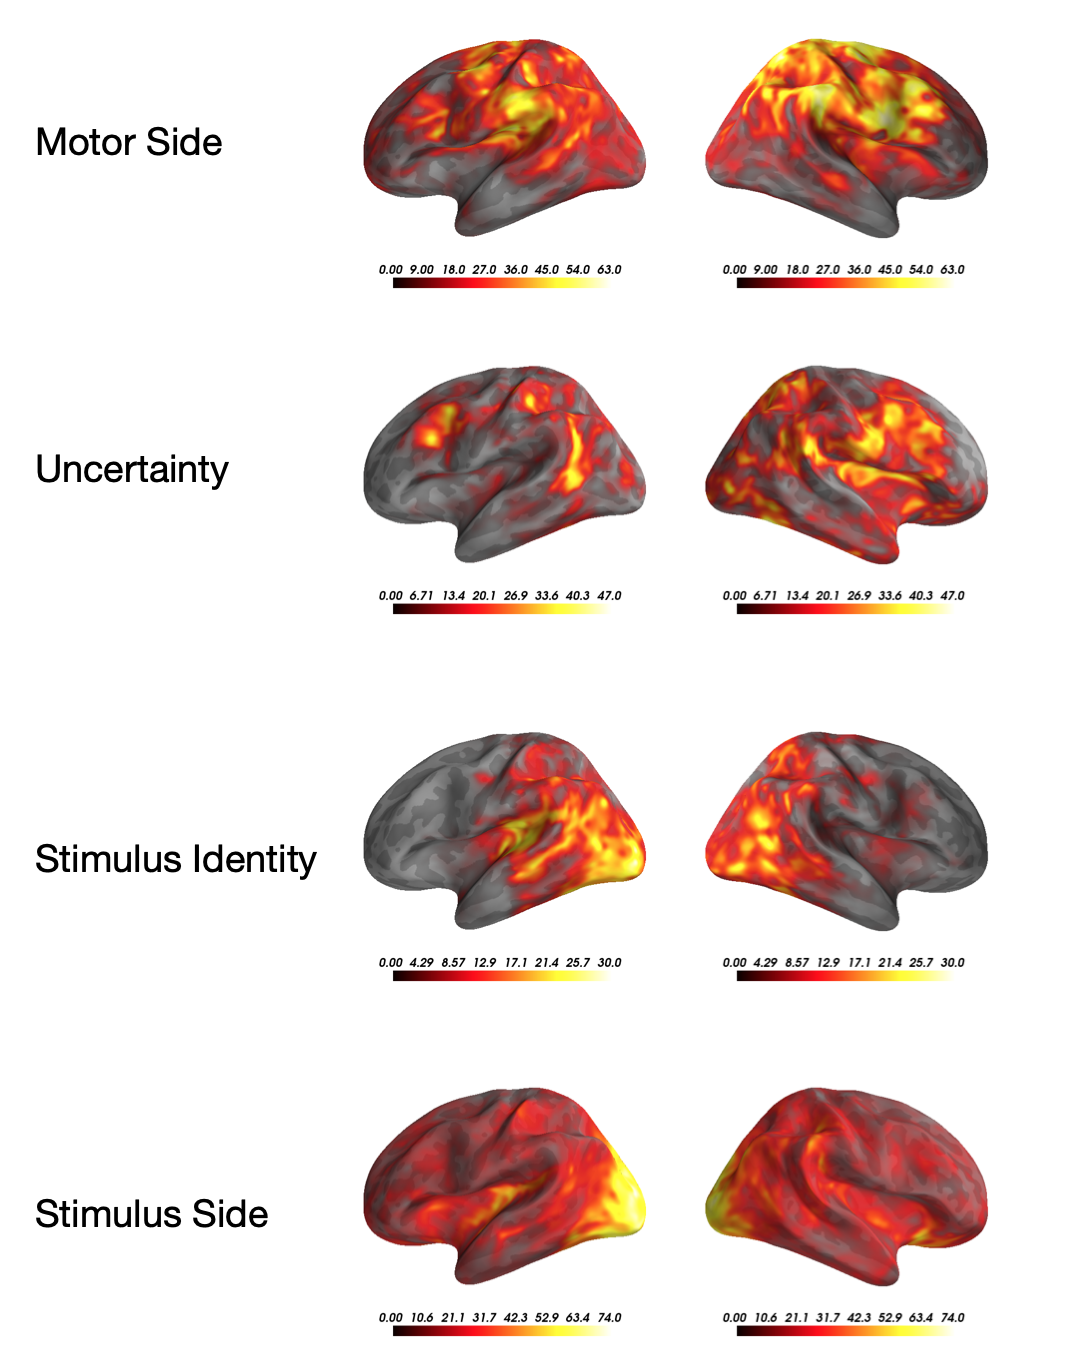

Supplement: supp [file elife-56603-supp-v1.zip › elife_poa_e56603_Figure_2_figure_supplement_8.png]

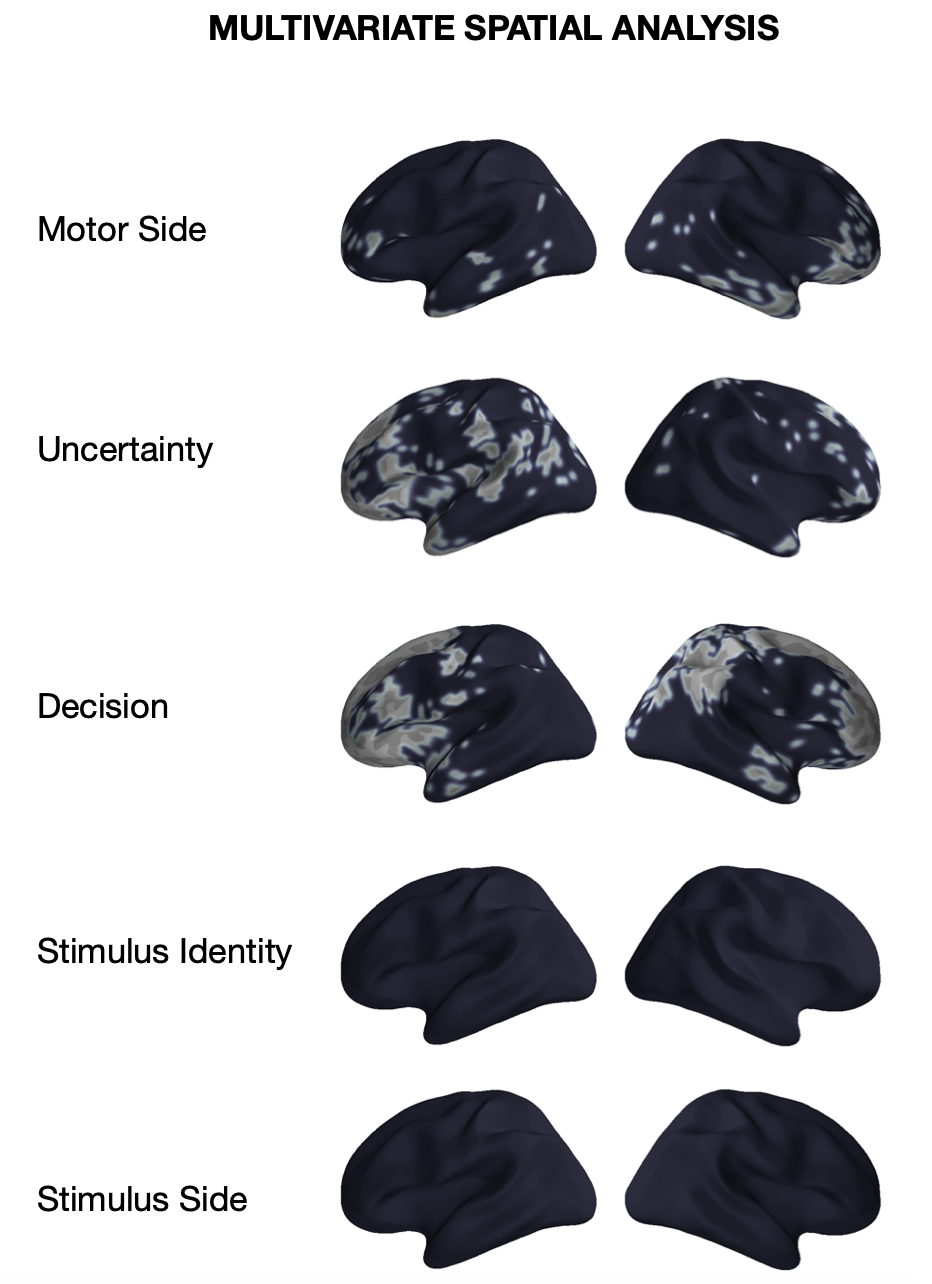

Supplement: supp [file elife-56603-supp-v1.zip › elife_poa_e56603_Figure_2_figure_supplement_9.png]

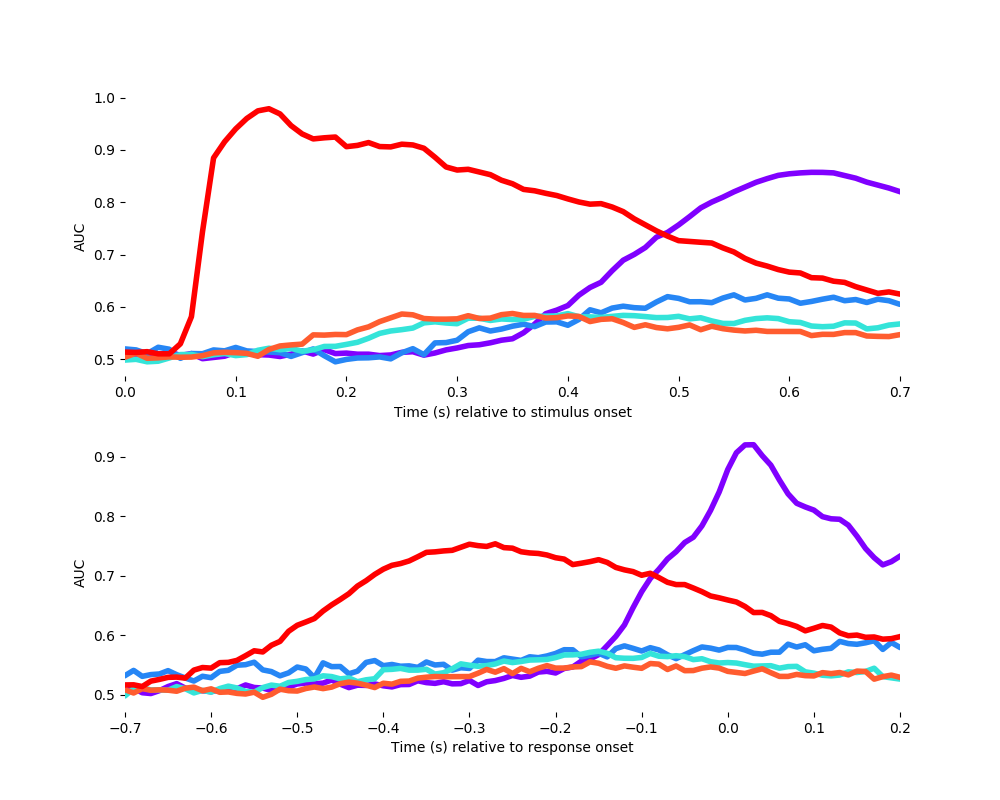

Supplement: supp [file elife-56603-supp-v1.zip › elife_poa_e56603_Figure_2_figure_supplement_11.png]

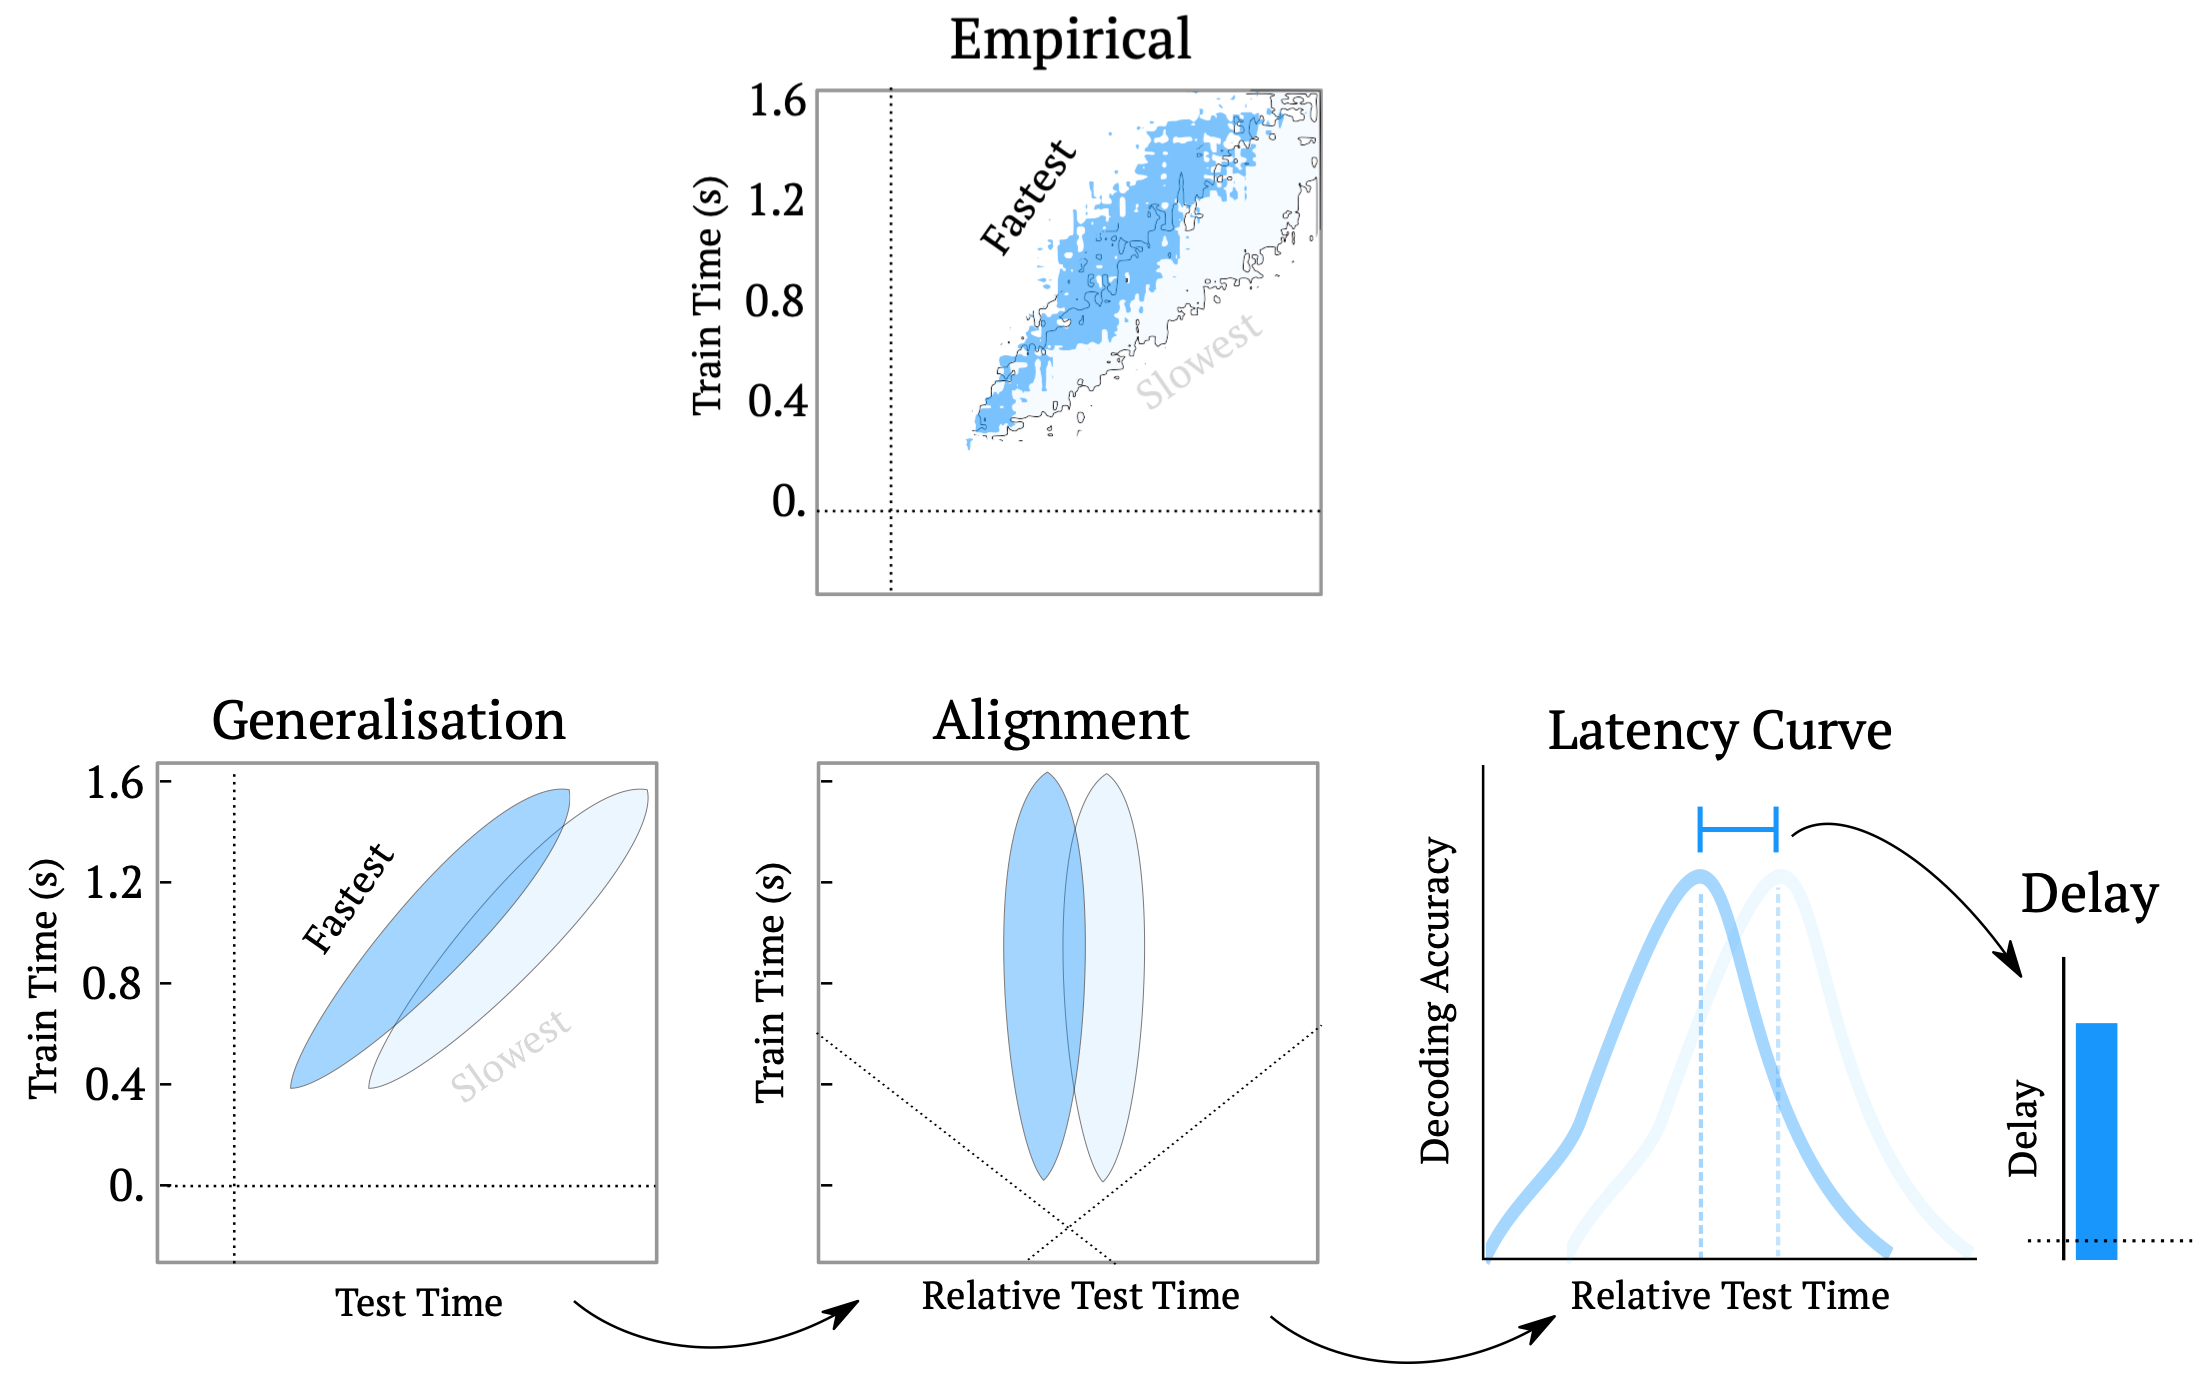

Supplement: supp [file elife-56603-supp-v1.zip › elife_poa_e56603_Figure_5_figure_supplement_1.png]

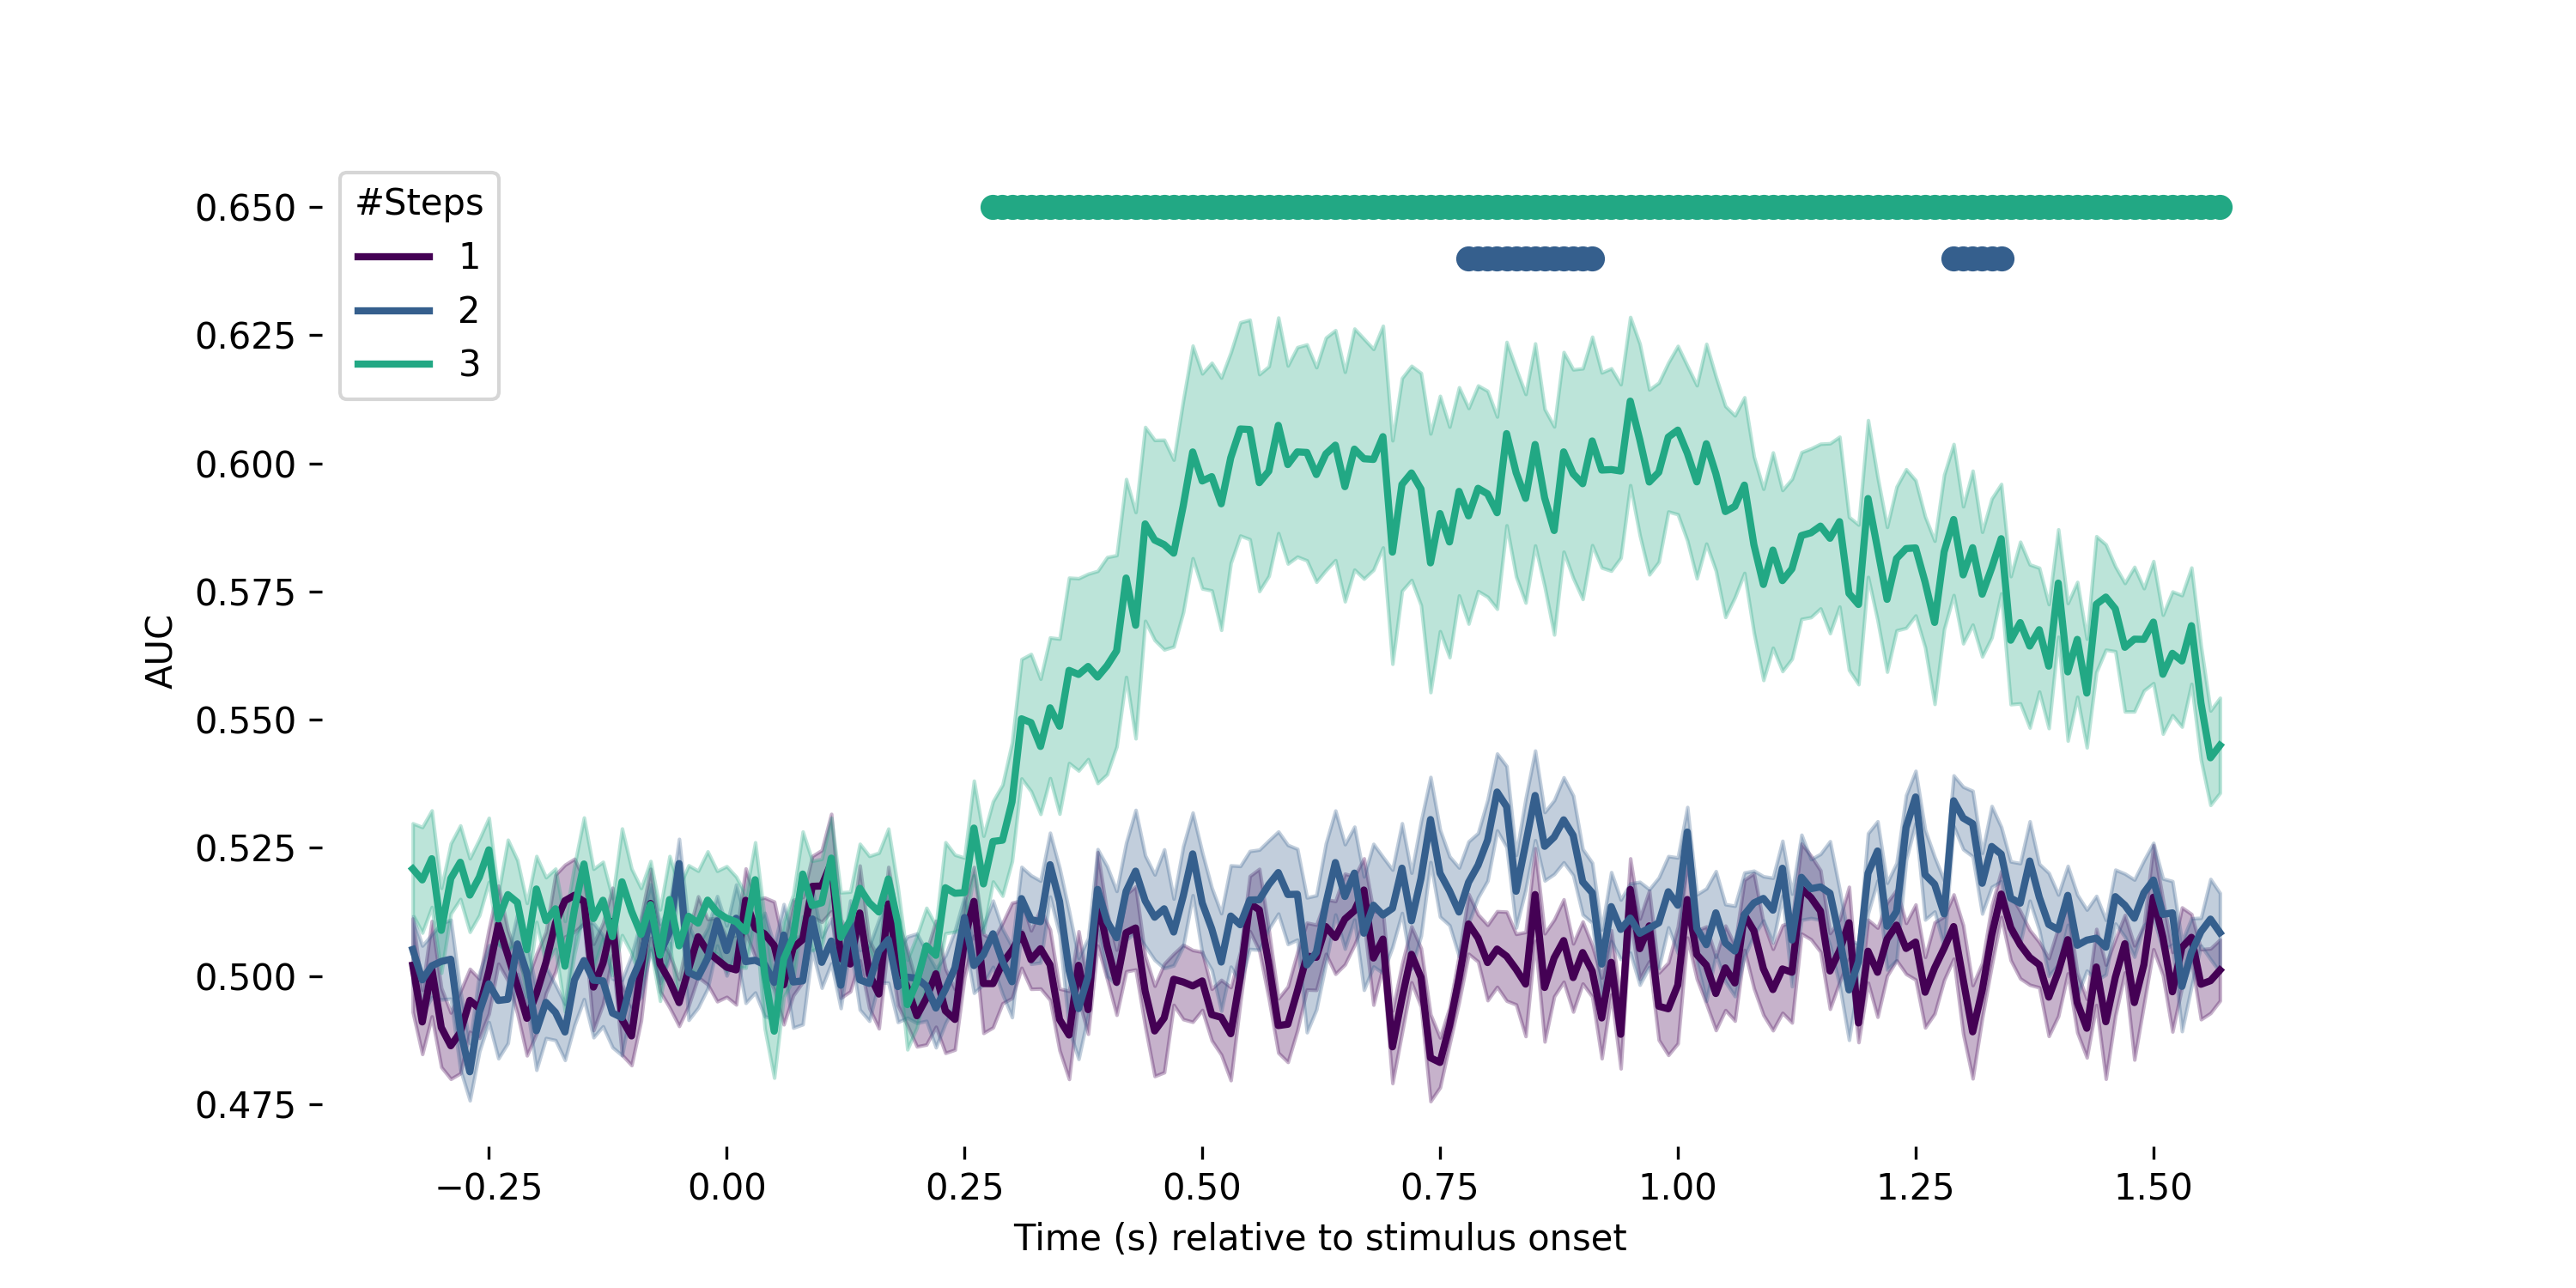

Supplement: supp [file elife-56603-supp-v1.zip › elife_poa_e56603_Figure_6_figure_supplement_1.png]

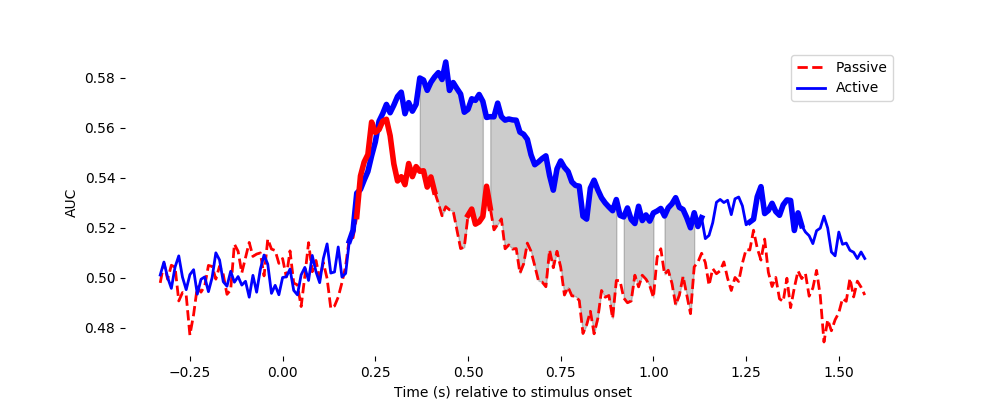

Supplement: supp [file elife-56603-supp-v1.zip › elife_poa_e56603_Figure_6_figure_supplement_2.png]
